# Supplementary material
Source: PubMed Central journal article supplement (PMC4288253)
Supplement: supp_M114.040360_mcp.M114.040360-1.pdf [file supp_M114.040360_mcp.M114.040360-1.pdf]

Supplementary Data: Supplementary Figures

Supplementary Figure S1

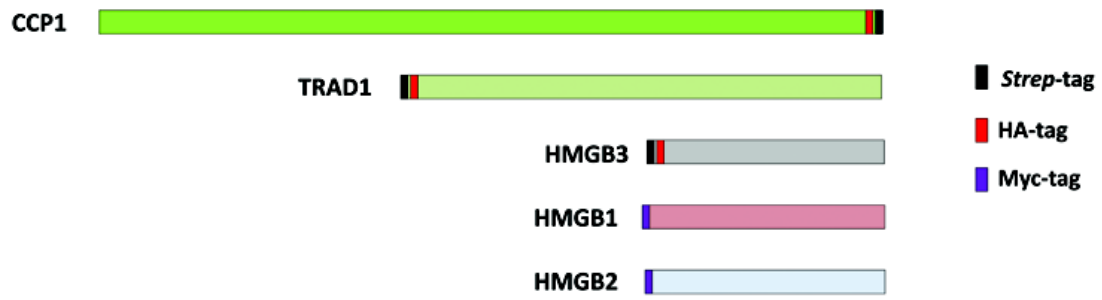

Supplementary Figure S1. Schematic representation of the constructs created for this study.

**Supplementary Figure S2 – Annotated spectra corresponding to the identifications presented in Table 1. a)  $\alpha$ -Tubulin 1A/1B, EDMAALEKDYEEVGVDSSVEGEGEEEG. b)  $\alpha$ -Tubulin 1C, EDMAALEKDYEEVGADSDAGEDEG. c) Eukaryotic translation initiation factor 4H, EEVQKEQ. d) Stathmin, KNKESKDPADTEA. e) 40S ribosomal protein S9, KNAKKGQGAGAGDDE. f) 40S ribosomal protein S9, KNAKKGQGAGAGDD. g) TRAF-type zinc finger domain-containing protein, TAKAKPSKQQGAGDA. h) High mobility group protein B3, KKVEEED. i) High mobility group protein B3, KKVEEED.**

**Suppl. Fig. S2. a) Protein:**  $\alpha$ -Tubulin 1A/1B, Uniprot Q71U36/P68363  
**Peptide sequence:** EDMAALEKDYEEVGVDSSVEGEGEEEG  
**Precursor m/z:** 984.4198  
**Precursor z:** +3  
**Highest Mascot score:** 98

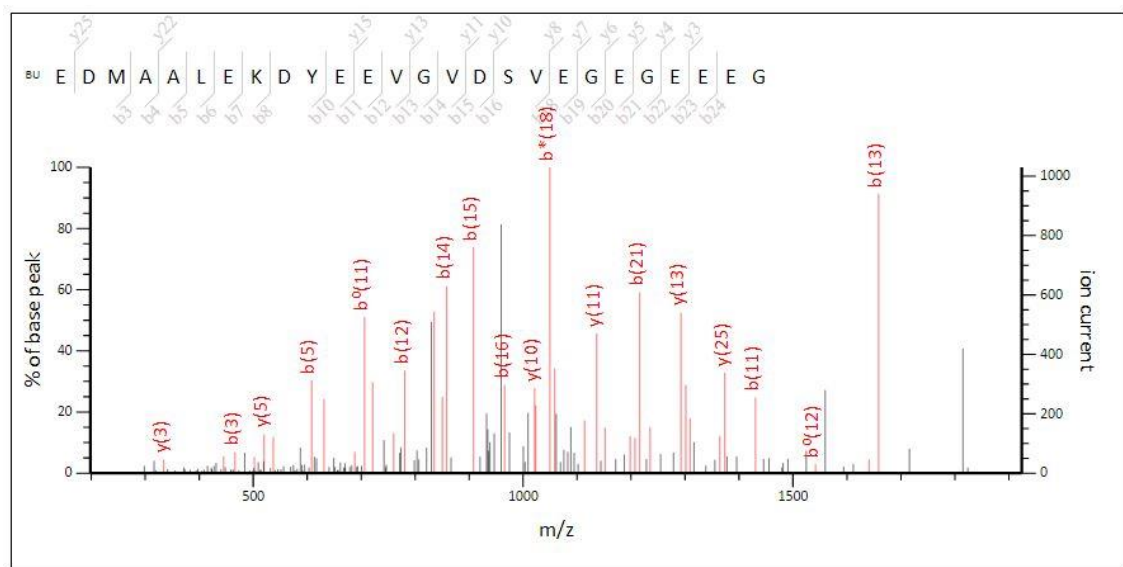

Monoisotopic mass of neutral peptide Mr(calc): 2949.2345  
 Fixed modifications: Acetyl:2H(3) (K), Oxidation (M) (apply to specified residues or termini only)  
 Variable modifications:  
 N-term : Butyl:13C(4) (N-term)  
 Ions Score: 98 Expect: 5.9e-010  
 Matches : 52/248 fragment ions using 58 most intense peaks

| #  | b                | b <sup>++</sup>  | b <sup>+</sup> | b <sup>+++</sup> | b <sup>0</sup>   | b <sup>0++</sup> | Seq. | y                | y <sup>++</sup>  | y <sup>+</sup> | y <sup>+++</sup> | y <sup>0</sup>   | y <sup>0++</sup> | #  |
|----|------------------|------------------|----------------|------------------|------------------|------------------|------|------------------|------------------|----------------|------------------|------------------|------------------|----|
| 1  | 204.1052         | 102.5562         |                |                  | 186.0946         | 93.5509          | E    |                  |                  |                |                  |                  |                  | 26 |
| 2  | 319.1321         | 160.0697         |                |                  | 301.1215         | 151.0644         | D    | 2747.1439        | <b>1374.0756</b> | 2730.1174      | 1365.5623        | 2729.1334        | 1365.0703        | 25 |
| 3  | <b>466.1675</b>  | 233.5874         |                |                  | 448.1569         | 224.5821         | M    | 2632.1170        | 1316.5621        | 2615.0904      | 1308.0489        | 2614.1064        | 1307.5568        | 24 |
| 4  | <b>537.2046</b>  | 269.1059         |                |                  | 519.1940         | 260.1007         | A    | 2485.0816        | 1243.0444        | 2468.0550      | 1234.5312        | 2467.0710        | 1234.0391        | 23 |
| 5  | <b>608.2417</b>  | 304.6245         |                |                  | 590.2312         | 295.6192         | A    | 2414.0445        | <b>1207.5259</b> | 2397.0179      | 1199.0126        | 2396.0339        | <b>1198.5206</b> | 22 |
| 6  | <b>721.3258</b>  | 361.1665         |                |                  | 703.3152         | 352.1612         | L    | 2343.0073        | 1172.0073        | 2325.9808      | 1163.4940        | 2324.9968        | 1163.0020        | 21 |
| 7  | <b>850.3684</b>  | 425.6878         |                |                  | 832.3578         | 416.6825         | E    | 2229.9233        | 1115.4653        | 2212.8967      | 1106.9520        | 2211.9127        | 1106.4600        | 20 |
| 8  | <b>1023.4927</b> | 512.2500         | 1006.4662      | 503.7367         | 1005.4822        | 503.2447         | K    | 2100.8807        | 1050.9440        | 2083.8541      | 1042.4307        | 2082.8701        | 1041.9387        | 19 |
| 9  | 1138.5197        | 569.7635         | 1121.4931      | 561.2502         | 1120.5091        | 560.7582         | D    | 1927.7563        | 964.3818         |                |                  | 1909.7458        | 955.3765         | 18 |
| 10 | <b>1301.5830</b> | 651.2951         | 1284.5565      | 642.7819         | 1283.5724        | 642.2899         | Y    | 1812.7294        | 906.8683         |                |                  | 1794.7188        | 897.8631         | 17 |
| 11 | <b>1430.6256</b> | 715.8164         | 1413.5991      | 707.3032         | 1412.6150        | <b>706.8112</b>  | E    | 1649.6661        | 825.3367         |                |                  | 1631.6555        | 816.3314         | 16 |
| 12 | <b>1559.6682</b> | <b>780.3377</b>  | 1542.6416      | 771.8245         | <b>1541.6576</b> | 771.3325         | E    | 1520.6235        | <b>760.8154</b>  |                |                  | 1502.6129        | 751.8101         | 15 |
| 13 | <b>1658.7366</b> | <b>829.8719</b>  | 1641.7101      | 821.3587         | <b>1640.7260</b> | 820.8667         | V    | 1391.5809        | 696.2941         |                |                  | <b>1373.5703</b> | 687.2888         | 14 |
| 14 | <b>1715.7581</b> | <b>858.3827</b>  | 1698.7315      | 849.8694         | 1697.7475        | 849.3774         | G    | <b>1292.5125</b> | 646.7599         |                |                  | 1274.5019        | 637.7546         | 13 |
| 15 | <b>1814.8265</b> | <b>907.9169</b>  | 1797.7999      | 899.4036         | 1796.8159        | 898.9116         | V    | <b>1235.4910</b> | 618.2491         |                |                  | 1217.4804        | 609.2439         | 12 |
| 16 | 1929.8534        | <b>965.4304</b>  | 1912.8269      | 956.9171         | 1911.8429        | 956.4251         | D    | <b>1136.4226</b> | 568.7149         |                |                  | 1118.4120        | 559.7096         | 11 |
| 17 | 2016.8855        | 1008.9464        | 1999.8589      | 1000.4331        | 1998.8749        | 999.9411         | S    | <b>1021.3956</b> | 511.2015         |                |                  | 1003.3851        | <b>502.1962</b>  | 10 |
| 18 | 2115.9539        | <b>1058.4806</b> | 2098.9273      | <b>1049.9673</b> | 2097.9433        | <b>1049.4753</b> | V    | 934.3636         | 467.6854         |                |                  | 916.3530         | 458.6802         | 9  |
| 19 | 2244.9965        | 1123.0019        | 2227.9699      | 1114.4886        | 2226.9859        | <b>1113.9966</b> | E    | <b>835.2952</b>  | 418.1512         |                |                  | 817.2846         | 409.1460         | 8  |
| 20 | 2302.0179        | <b>1151.5126</b> | 2284.9914      | 1142.9993        | 2284.0074        | 1142.5073        | G    | <b>706.2526</b>  | 353.6299         |                |                  | <b>688.2420</b>  | 344.6247         | 7  |
| 21 | 2431.0605        | <b>1216.0339</b> | 2414.0340      | <b>1207.5206</b> | 2413.0500        | <b>1207.0286</b> | E    | 649.2311         | 325.1192         |                |                  | <b>631.2206</b>  | <b>316.1139</b>  | 6  |
| 22 | 2488.0820        | 1244.5446        | 2471.0554      | 1236.0314        | 2470.0714        | <b>1235.5393</b> | G    | <b>520.1885</b>  | 260.5979         |                |                  | <b>502.1780</b>  | 251.5926         | 5  |
| 23 | 2617.1246        | <b>1309.0659</b> | 2600.0980      | 1300.5527        | 2599.1140        | 1300.0606        | E    | 463.1671         | 232.0872         |                |                  | <b>445.1565</b>  | 223.0819         | 4  |
| 24 | 2746.1672        | <b>1373.5872</b> | 2729.1406      | 1365.0740        | 2728.1566        | <b>1364.5819</b> | E    | <b>334.1245</b>  | 167.5659         |                |                  | <b>316.1139</b>  | 158.5606         | 3  |
| 25 | 2875.2098        | 1438.1085        | 2858.1832      | 1429.5952        | 2857.1992        | 1429.1032        | E    | 205.0819         | 103.0446         |                |                  | 187.0713         | 94.0393          | 2  |
| 26 |                  |                  |                |                  |                  |                  | G    | 76.0393          | 38.5233          |                |                  |                  |                  | 1  |

Suppl. Fig. S2. b) Protein:  $\alpha$ -Tubulin 1C, Uniprot Q9BQE3  
 Peptide sequence: EDMAALEKDYEEVGADSDADGEEG  
 Precursor m/z: 894.3645  
 Precursor z: +3  
 Highest Mascot score: 78

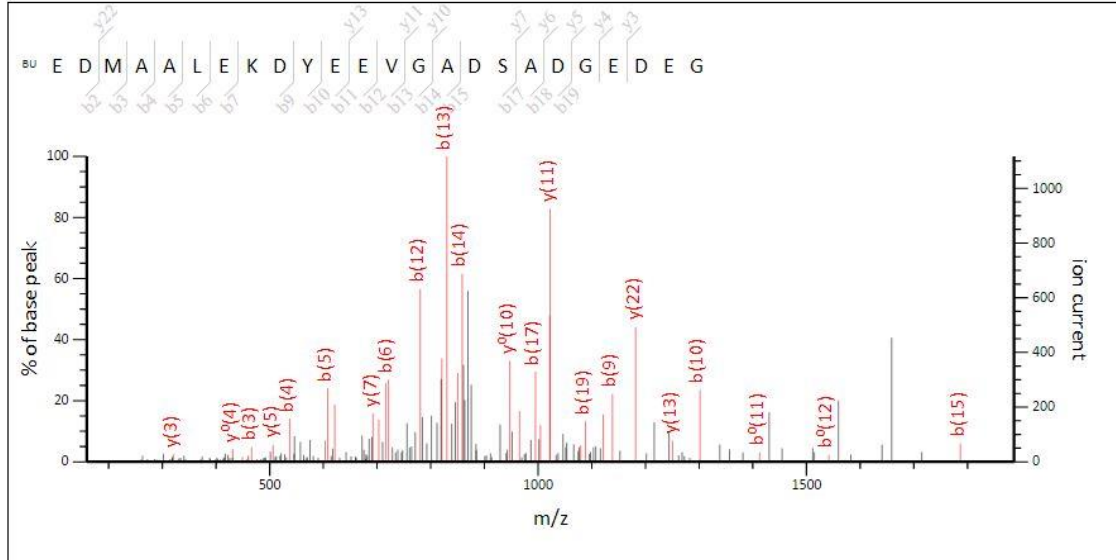

Monoisotopic mass of neutral peptide Mr(calc): 2679.0765  
 Fixed modifications: Acetyl:2H(3) (K),Oxidation (M) (apply to specified residues or termini only)  
 Variable modifications:  
 N-term : Butyl:13C(4) (N-term)  
 Ions Score: 78 Expect: 5.5e-008  
 Matches : 45/228 fragment ions using 68 most intense peaks

| #  | b                | b <sup>++</sup>  | b <sup>*</sup>   | b <sup>+++</sup> | b <sup>0</sup>   | b <sup>0++</sup> | Seq. | y                | y <sup>++</sup>  | y <sup>*</sup> | y <sup>+++</sup> | y <sup>0</sup>   | y <sup>0++</sup> | #  |
|----|------------------|------------------|------------------|------------------|------------------|------------------|------|------------------|------------------|----------------|------------------|------------------|------------------|----|
| 1  | 204.1052         | 102.5562         |                  |                  | 186.0946         | 93.5509          | E    |                  |                  |                |                  |                  |                  | 24 |
| 2  | <b>319.1321</b>  | 160.0697         |                  |                  | 301.1215         | 151.0644         | D    | 2476.9860        | 1238.9966        | 2459.9594      | 1230.4833        | 2458.9754        | 1229.9913        | 23 |
| 3  | <b>466.1675</b>  | 233.5874         |                  |                  | 448.1569         | 224.5821         | M    | 2361.9590        | <b>1181.4831</b> | 2344.9325      | 1172.9699        | 2343.9485        | 1172.4779        | 22 |
| 4  | <b>537.2046</b>  | 269.1059         |                  |                  | 519.1940         | 260.1007         | A    | 2214.9236        | 1107.9654        | 2197.8971      | 1099.4522        | 2196.9131        | 1098.9602        | 21 |
| 5  | <b>608.2417</b>  | 304.6245         |                  |                  | 590.2312         | 295.6192         | A    | 2143.8865        | 1072.4469        | 2126.8600      | 1063.9336        | 2125.8759        | 1063.4416        | 20 |
| 6  | <b>721.3258</b>  | 361.1665         |                  |                  | <b>703.3152</b>  | 352.1612         | L    | 2072.8494        | 1036.9283        | 2055.8228      | 1028.4151        | 2054.8388        | 1027.9231        | 19 |
| 7  | <b>850.3684</b>  | 425.6878         |                  |                  | 832.3578         | 416.6825         | E    | 1959.7653        | 980.3863         | 1942.7388      | 971.8730         | 1941.7548        | 971.3810         | 18 |
| 8  | 1023.4927        | 512.2500         | 1006.4662        | 503.7367         | 1005.4822        | 503.2447         | K    | 1830.7227        | 915.8650         | 1813.6962      | 907.3517         | 1812.7122        | 906.8597         | 17 |
| 9  | <b>1138.5197</b> | 569.7635         | <b>1121.4931</b> | 561.2502         | 1120.5091        | 560.7582         | D    | 1657.5984        | 829.3028         |                |                  | 1639.5878        | <b>820.2975</b>  | 16 |
| 10 | <b>1301.5830</b> | 651.2951         | 1284.5565        | 642.7819         | 1283.5724        | 642.2899         | Y    | 1542.5714        | 771.7894         |                |                  | 1524.5609        | 762.7841         | 15 |
| 11 | <b>1430.6256</b> | <b>715.8164</b>  | 1413.5991        | 707.3032         | <b>1412.6150</b> | 706.8112         | E    | 1379.5081        | 690.2577         |                |                  | 1361.4975        | 681.2524         | 14 |
| 12 | <b>1559.6682</b> | <b>780.3377</b>  | 1542.6416        | 771.8245         | <b>1541.6576</b> | 771.3325         | E    | <b>1250.4655</b> | 625.7364         |                |                  | 1232.4549        | 616.7311         | 13 |
| 13 | <b>1658.7366</b> | <b>829.8719</b>  | 1641.7101        | 821.3587         | <b>1640.7260</b> | <b>820.8667</b>  | V    | <b>1121.4229</b> | 561.2151         |                |                  | 1103.4124        | 552.2098         | 12 |
| 14 | 1715.7581        | <b>858.3827</b>  | 1698.7315        | 849.8694         | 1697.7475        | 849.3774         | G    | <b>1022.3545</b> | 511.6809         |                |                  | <b>1004.3439</b> | 502.6756         | 11 |
| 15 | <b>1786.7952</b> | 893.9012         | 1769.7686        | 885.3880         | 1768.7846        | 884.8960         | A    | <b>965.3330</b>  | 483.1702         |                |                  | <b>947.3225</b>  | 474.1649         | 10 |
| 16 | 1901.8221        | 951.4147         | 1884.7956        | 942.9014         | 1883.8116        | 942.4094         | D    | 894.2959         | 447.6516         |                |                  | 876.2854         | 438.6463         | 9  |
| 17 | 1988.8542        | <b>994.9307</b>  | 1971.8276        | 986.4174         | 1970.8436        | 985.9254         | S    | 779.2690         | 390.1381         |                |                  | 761.2584         | 381.1328         | 8  |
| 18 | 2059.8913        | 1030.4493        | 2042.8647        | <b>1021.9360</b> | 2041.8807        | <b>1021.4440</b> | A    | <b>692.2370</b>  | 346.6221         |                |                  | 674.2264         | 337.6168         | 7  |
| 19 | 2174.9182        | <b>1087.9627</b> | 2157.8917        | <b>1079.4495</b> | 2156.9077        | <b>1078.9575</b> | D    | <b>621.1998</b>  | 311.1036         |                |                  | <b>603.1893</b>  | <b>302.0983</b>  | 6  |
| 20 | 2231.9397        | 1116.4735        | 2214.9131        | 1107.9602        | 2213.9291        | 1107.4682        | G    | <b>506.1729</b>  | 253.5901         |                |                  | 488.1623         | 244.5848         | 5  |
| 21 | 2360.9823        | 1180.9948        | 2343.9557        | 1172.4815        | 2342.9717        | 1171.9895        | E    | <b>449.1514</b>  | 225.0794         |                |                  | <b>431.1409</b>  | 216.0741         | 4  |
| 22 | 2476.0092        | 1238.5082        | 2458.9827        | 1229.9950        | 2457.9987        | 1229.5030        | D    | <b>320.1088</b>  | 160.5581         |                |                  | <b>302.0983</b>  | 151.5528         | 3  |
| 23 | 2605.0518        | 1303.0295        | 2588.0253        | 1294.5163        | 2587.0412        | 1294.0243        | E    | 205.0819         | 103.0446         |                |                  | 187.0713         | 94.0393          | 2  |
| 24 |                  |                  |                  |                  |                  |                  | G    | 76.0393          | 38.5233          |                |                  |                  |                  | 1  |

**Suppl. Fig. S2. c) Protein:** Eukaryotic translation initiation factor 4H, Uniprot Q15056  
**Peptide sequence:** EEVVQKEQ  
**Precursor m/z:** 554.2928  
**Precursor z:** +2  
**Highest Mascot score:** 74

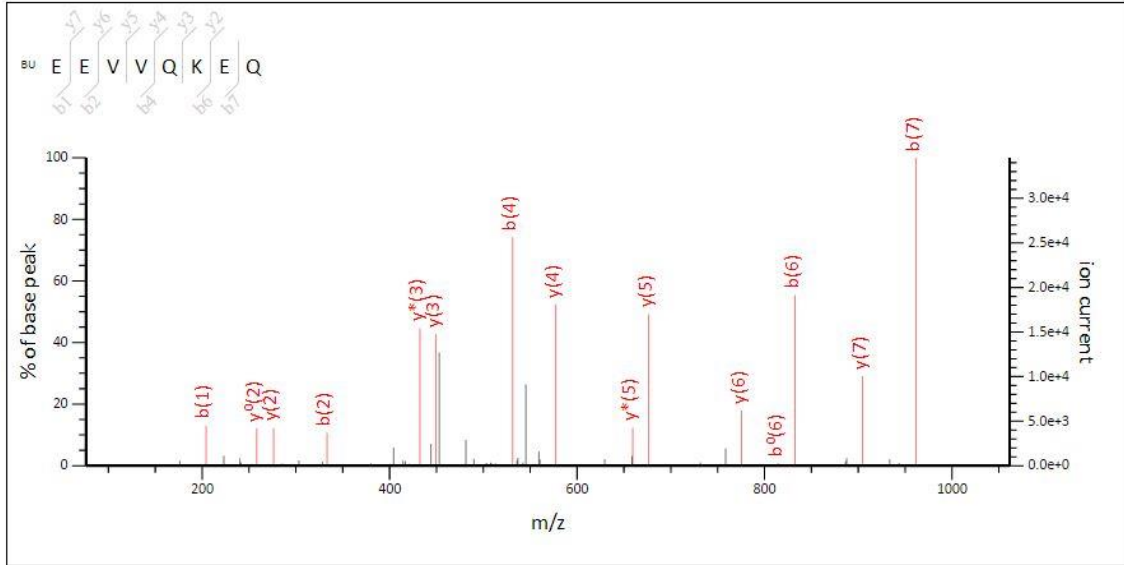

Monoisotopic mass of neutral peptide  $M_r(\text{calc})$ : 1106.5720  
 Fixed modifications: Acetyl:2H(3) (K), Oxidation (M) (apply to specified residues or termini only)  
 Variable modifications:  
 N-term : Butyl:13C(4) (N-term)  
 Ions Score: 74 Expect: 1.1e-005  
 Matches : 17/74 fragment ions using 16 most intense peaks

| # | b        | b <sup>++</sup> | b <sup>*</sup> | b <sup>*++</sup> | b <sup>0</sup> | b <sup>0++</sup> | Seq. | y        | y <sup>++</sup> | y <sup>*</sup> | y <sup>*++</sup> | y <sup>0</sup> | y <sup>0++</sup> | # |
|---|----------|-----------------|----------------|------------------|----------------|------------------|------|----------|-----------------|----------------|------------------|----------------|------------------|---|
| 1 | 204.1052 | 102.5562        |                |                  | 186.0946       | 93.5509          | E    |          |                 |                |                  |                |                  | 8 |
| 2 | 333.1477 | 167.0775        |                |                  | 315.1372       | 158.0722         | E    | 904.4814 | 452.7443        | 887.4548       | 444.2310         | 886.4708       | 443.7390         | 7 |
| 3 | 432.2162 | 216.6117        |                |                  | 414.2056       | 207.6064         | V    | 775.4388 | 388.2230        | 758.4122       | 379.7098         | 757.4282       | 379.2177         | 6 |
| 4 | 531.2846 | 266.1459        |                |                  | 513.2740       | 257.1406         | V    | 676.3704 | 338.6888        | 659.3438       | 330.1755         | 658.3598       | 329.6835         | 5 |
| 5 | 659.3432 | 330.1752        | 642.3166       | 321.6619         | 641.3326       | 321.1699         | Q    | 577.3019 | 289.1546        | 560.2754       | 280.6413         | 559.2914       | 280.1493         | 4 |
| 6 | 832.4675 | 416.7374        | 815.4410       | 408.2241         | 814.4569       | 407.7321         | K    | 449.2434 | 225.1253        | 432.2168       | 216.6120         | 431.2328       | 216.1200         | 3 |
| 7 | 961.5101 | 481.2587        | 944.4836       | 472.7454         | 943.4995       | 472.2534         | E    | 276.1190 | 138.5631        | 259.0925       | 130.0499         | 258.1084       | 129.5579         | 2 |
| 8 |          |                 |                |                  |                |                  | Q    | 147.0764 | 74.0418         | 130.0499       | 65.5286          |                |                  | 1 |

Suppl. Fig. S2. d) Protein: Stathmin, Uniprot P16949  
 Peptide sequence: KNKESKDPADETEA  
 Precursor m/z: 885.9427  
 Precursor z: +2  
 Highest Mascot score: 57

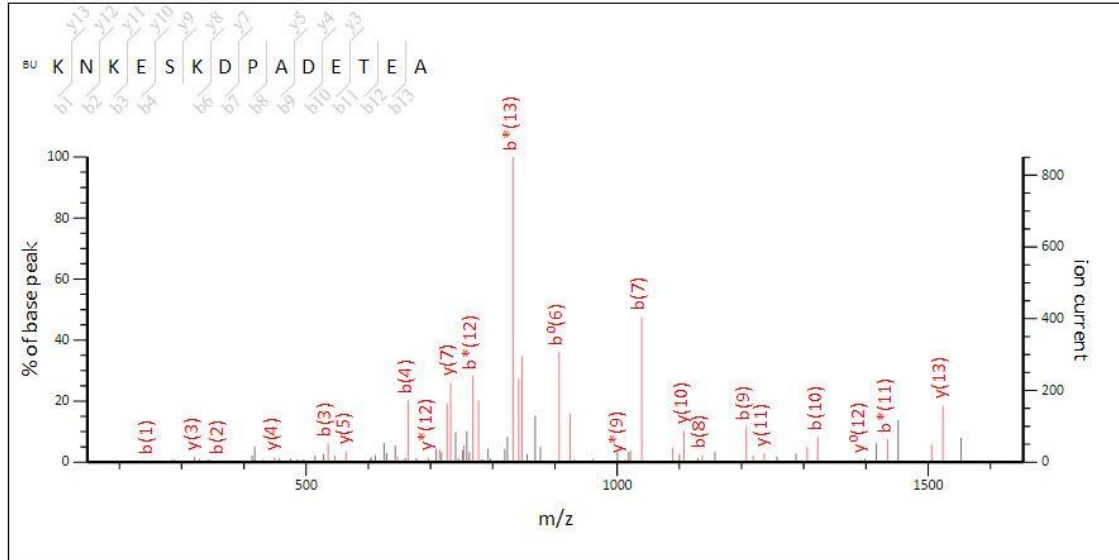

Monoisotopic mass of neutral peptide Mr(calc): 1769.8702  
 Fixed modifications: Acetyl:2H(3) (K), Oxidation (M) (apply to specified residues or termini only)  
 Variable modifications:  
 N-term : Butyl:13C(4) (N-term)  
 Ions Score: 57 Expect: 3.3e-005  
 Matches : 48/132 fragment ions using 89 most intense peaks

| #  | b         | b <sup>++</sup> | b*        | b <sup>+++</sup> | b <sup>0</sup> | b <sup>0++</sup> | Seq. | y         | y <sup>++</sup> | y*        | y <sup>+++</sup> | y <sup>0</sup> | y <sup>0++</sup> | #  |
|----|-----------|-----------------|-----------|------------------|----------------|------------------|------|-----------|-----------------|-----------|------------------|----------------|------------------|----|
| 1  | 248.1869  | 124.5971        | 231.1604  | 116.0838         |                |                  | K    |           |                 |           |                  |                |                  | 14 |
| 2  | 362.2298  | 181.6186        | 345.2033  | 173.1053         |                |                  | N    | 1523.6978 | 762.3526        | 1506.6713 | 753.8393         | 1505.6873      | 753.3473         | 13 |
| 3  | 535.3542  | 268.1807        | 518.3277  | 259.6675         |                |                  | K    | 1409.6549 | 705.3311        | 1392.6284 | 696.8178         | 1391.6444      | 696.3258         | 12 |
| 4  | 664.3968  | 332.7020        | 647.3702  | 324.1888         | 646.3862       | 323.6968         | E    | 1236.5306 | 618.7689        | 1219.5040 | 610.2556         | 1218.5200      | 609.7636         | 11 |
| 5  | 751.4288  | 376.2181        | 734.4023  | 367.7048         | 733.4183       | 367.2128         | S    | 1107.4880 | 554.2476        | 1090.4614 | 545.7343         | 1089.4774      | 545.2423         | 10 |
| 6  | 924.5532  | 462.7802        | 907.5266  | 454.2670         | 906.5426       | 453.7749         | K    | 1020.4559 | 510.7316        | 1003.4294 | 502.2183         | 1002.4454      | 501.7263         | 9  |
| 7  | 1039.5801 | 520.2937        | 1022.5536 | 511.7804         | 1021.5696      | 511.2884         | D    | 847.3316  | 424.1694        |           |                  | 829.3210       | 415.1641         | 8  |
| 8  | 1136.6329 | 568.8201        | 1119.6063 | 560.3068         | 1118.6223      | 559.8148         | P    | 732.3046  | 366.6560        |           |                  | 714.2941       | 357.6507         | 7  |
| 9  | 1207.6700 | 604.3386        | 1190.6435 | 595.8254         | 1189.6594      | 595.3334         | A    | 635.2519  | 318.1296        |           |                  | 617.2413       | 309.1243         | 6  |
| 10 | 1322.6969 | 661.8521        | 1305.6704 | 653.3388         | 1304.6864      | 652.8468         | D    | 564.2148  | 282.6110        |           |                  | 546.2042       | 273.6057         | 5  |
| 11 | 1451.7395 | 726.3734        | 1434.7130 | 717.8601         | 1433.7290      | 717.3681         | E    | 449.1878  | 225.0975        |           |                  | 431.1773       | 216.0923         | 4  |
| 12 | 1552.7872 | 776.8972        | 1535.7607 | 768.3840         | 1534.7767      | 767.8920         | T    | 320.1452  | 160.5763        |           |                  | 302.1347       | 151.5710         | 3  |
| 13 | 1681.8298 | 841.4185        | 1664.8033 | 832.9053         | 1663.8192      | 832.4133         | E    | 219.0975  | 110.0524        |           |                  | 201.0870       | 101.0471         | 2  |
| 14 |           |                 |           |                  |                |                  | A    | 90.0550   | 45.5311         |           |                  |                |                  | 1  |

**Suppl. Fig. S2. e) Protein:** 40S ribosomal protein S9, Uniprot P46781  
**Peptide sequence:** KNAKKKGQGAGAGDDE  
**Precursor m/z:** 856.4344  
**Precursor z:** +2  
**Highest Mascot score:** 102

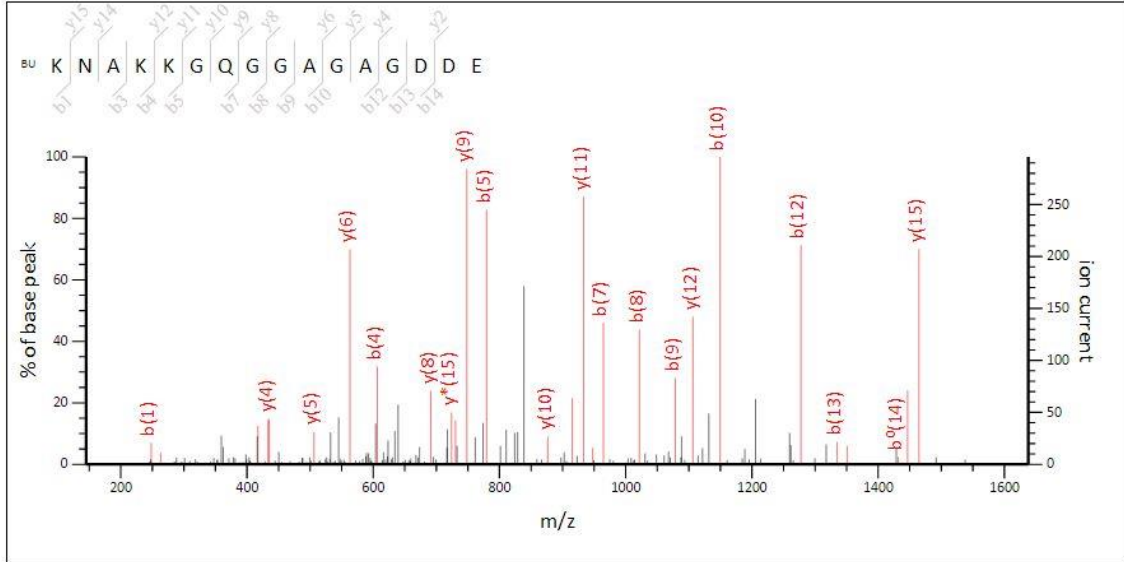

Monoisotopic mass of neutral peptide Mr(calc): 1710.8556  
 Fixed modifications: Acetyl:2H(3) (K), Oxidation (M) (apply to specified residues or termini only)  
 Variable modifications:  
 N-term : Butyl:13C(4) (N-term)  
 Ions Score: 102 Expect: 3.2e-009  
 Matches : 30/136 fragment ions using 39 most intense peaks

| #  | b                | b <sup>++</sup> | b <sup>*</sup>  | b <sup>+++</sup> | b <sup>0</sup>   | b <sup>0++</sup> | Seq.     | y                | y <sup>++</sup> | y <sup>*</sup> | y <sup>+++</sup> | y <sup>0</sup>   | y <sup>0++</sup> | #         |
|----|------------------|-----------------|-----------------|------------------|------------------|------------------|----------|------------------|-----------------|----------------|------------------|------------------|------------------|-----------|
| 1  | <b>248.1869</b>  | 124.5971        | 231.1604        | 116.0838         |                  |                  | <b>K</b> |                  |                 |                |                  |                  |                  | <b>16</b> |
| 2  | 362.2298         | 181.6186        | 345.2033        | 173.1053         |                  |                  | <b>N</b> | <b>1464.6832</b> | 732.8452        | 1447.6567      | <b>724.3320</b>  | <b>1446.6726</b> | <b>723.8400</b>  | <b>15</b> |
| 3  | <b>433.2670</b>  | 217.1371        | 416.2404        | 208.6238         |                  |                  | <b>A</b> | <b>1350.6403</b> | 675.8238        | 1333.6137      | 667.3105         | 1332.6297        | 666.8185         | <b>14</b> |
| 4  | <b>606.3913</b>  | 303.6993        | 589.3648        | 295.1860         |                  |                  | <b>K</b> | 1279.6032        | 640.3052        | 1262.5766      | 631.7919         | 1261.5926        | 631.2999         | <b>13</b> |
| 5  | <b>779.5157</b>  | 390.2615        | 762.4891        | 381.7482         |                  |                  | <b>K</b> | <b>1106.4788</b> | 553.7430        | 1089.4523      | 545.2298         | 1088.4682        | 544.7378         | <b>12</b> |
| 6  | 836.5371         | 418.7722        | 819.5106        | 410.2589         |                  |                  | <b>G</b> | <b>933.3544</b>  | 467.1809        | 916.3279       | 458.6676         | <b>915.3439</b>  | 458.1756         | <b>11</b> |
| 7  | <b>964.5957</b>  | 482.8015        | <b>947.5692</b> | 474.2882         |                  |                  | <b>Q</b> | <b>876.3330</b>  | 438.6701        | 859.3064       | 430.1569         | 858.3224         | 429.6648         | <b>10</b> |
| 8  | <b>1021.6172</b> | 511.3122        | 1004.5906       | 502.7990         |                  |                  | <b>G</b> | <b>748.2744</b>  | 374.6408        |                |                  | <b>730.2638</b>  | 365.6356         | <b>9</b>  |
| 9  | <b>1078.6386</b> | 539.8230        | 1061.6121       | 531.3097         |                  |                  | <b>G</b> | <b>691.2529</b>  | 346.1301        |                |                  | 673.2424         | 337.1248         | <b>8</b>  |
| 10 | <b>1149.6758</b> | 575.3415        | 1132.6492       | 566.8282         |                  |                  | <b>A</b> | 634.2315         | 317.6194        |                |                  | 616.2209         | 308.6141         | <b>7</b>  |
| 11 | 1206.6972        | 603.8522        | 1189.6707       | 595.3390         |                  |                  | <b>G</b> | <b>563.1944</b>  | 282.1008        |                |                  | 545.1838         | 273.0955         | <b>6</b>  |
| 12 | <b>1277.7343</b> | <b>639.3708</b> | 1260.7078       | 630.8575         |                  |                  | <b>A</b> | <b>506.1729</b>  | 253.5901        |                |                  | 488.1623         | 244.5848         | <b>5</b>  |
| 13 | <b>1334.7558</b> | 667.8815        | 1317.7293       | 659.3683         |                  |                  | <b>G</b> | <b>435.1358</b>  | 218.0715        |                |                  | <b>417.1252</b>  | 209.0662         | <b>4</b>  |
| 14 | 1449.7827        | 725.3950        | 1432.7562       | 716.8817         | <b>1431.7722</b> | 716.3897         | <b>D</b> | 378.1143         | 189.5608        |                |                  | 360.1038         | 180.5555         | <b>3</b>  |
| 15 | 1564.8097        | 782.9085        | 1547.7831       | 774.3952         | 1546.7991        | 773.9032         | <b>D</b> | <b>263.0874</b>  | 132.0473        |                |                  | 245.0768         | 123.0420         | <b>2</b>  |
| 16 |                  |                 |                 |                  |                  |                  | <b>E</b> | 148.0604         | 74.5339         |                |                  | 130.0499         | 65.5286          | <b>1</b>  |

**Suppl. Fig. S2. f) Protein:** 40S ribosomal protein S9, Uniprot P46781  
**Peptide sequence:** KNAKKKGQGGAGAGDD  
**Precursor m/z:** 791.9128  
**Precursor z:** +2  
**Highest Mascot score:** 92

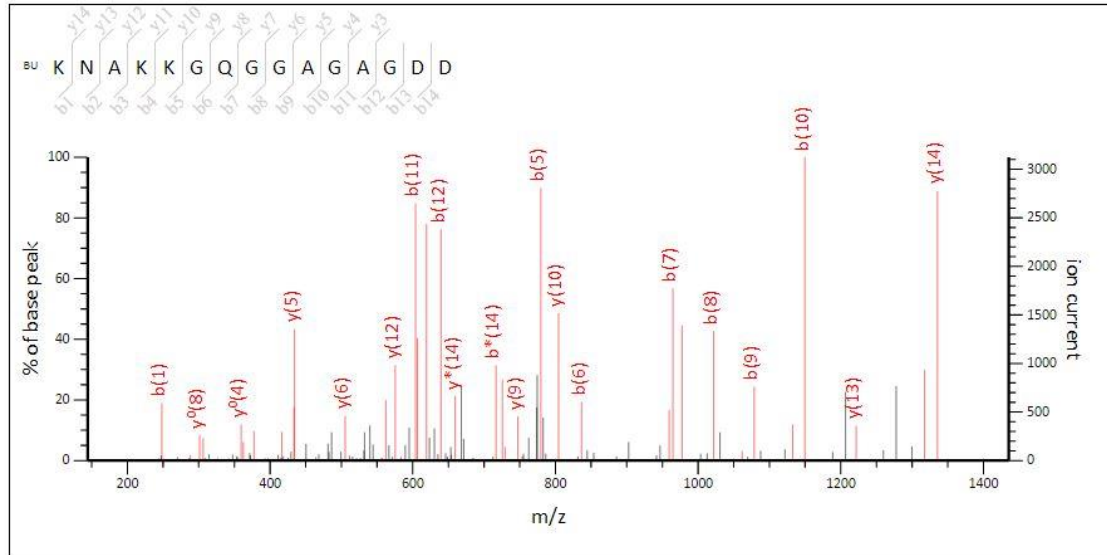

Monoisotopic mass of neutral peptide  $M_r(\text{calc})$ : 1581.8130  
 Fixed modifications: Acetyl:2H(3) (K), Oxidation (M) (apply to specified residues or termini only)  
 Variable modifications:  
 N-term : Butyl:13C(4) (N-term)  
 Ions Score: 92 Expect: 4.8e-008  
 Matches : 48/126 fragment ions using 62 most intense peaks

| #  | b         | b <sup>++</sup> | b*        | b <sup>+++</sup> | b <sup>0</sup> | b <sup>0++</sup> | Seq. | y         | y <sup>++</sup> | y*        | y <sup>+++</sup> | y <sup>0</sup> | y <sup>0++</sup> | #  |
|----|-----------|-----------------|-----------|------------------|----------------|------------------|------|-----------|-----------------|-----------|------------------|----------------|------------------|----|
| 1  | 248.1869  | 124.5971        | 231.1604  | 116.0838         |                |                  | K    |           |                 |           |                  |                |                  | 15 |
| 2  | 362.2298  | 181.6186        | 345.2033  | 173.1053         |                |                  | N    | 1335.6406 | 668.3239        | 1318.6141 | 659.8107         | 1317.6300      | 659.3187         | 14 |
| 3  | 433.2670  | 217.1371        | 416.2404  | 208.6238         |                |                  | A    | 1221.5977 | 611.3025        | 1204.5711 | 602.7892         | 1203.5871      | 602.2972         | 13 |
| 4  | 606.3913  | 303.6993        | 589.3648  | 295.1860         |                |                  | K    | 1150.5606 | 575.7839        | 1133.5340 | 567.2706         | 1132.5500      | 566.7786         | 12 |
| 5  | 779.5157  | 390.2615        | 762.4891  | 381.7482         |                |                  | K    | 977.4362  | 489.2217        | 960.4097  | 480.7085         | 959.4256       | 480.2165         | 11 |
| 6  | 836.5371  | 418.7722        | 819.5106  | 410.2589         |                |                  | G    | 804.3119  | 402.6596        | 787.2853  | 394.1463         | 786.3013       | 393.6543         | 10 |
| 7  | 964.5957  | 482.8015        | 947.5692  | 474.2882         |                |                  | Q    | 747.2904  | 374.1488        | 730.2638  | 365.6356         | 729.2798       | 365.1436         | 9  |
| 8  | 1021.6172 | 511.3122        | 1004.5906 | 502.7990         |                |                  | G    | 619.2318  | 310.1195        |           |                  | 601.2212       | 301.1143         | 8  |
| 9  | 1078.6386 | 539.8230        | 1061.6121 | 531.3097         |                |                  | G    | 562.2103  | 281.6088        |           |                  | 544.1998       | 272.6035         | 7  |
| 10 | 1149.6758 | 575.3415        | 1132.6492 | 566.8282         |                |                  | A    | 505.1889  | 253.0981        |           |                  | 487.1783       | 244.0928         | 6  |
| 11 | 1206.6972 | 603.8522        | 1189.6707 | 595.3390         |                |                  | G    | 434.1518  | 217.5795        |           |                  | 416.1412       | 208.5742         | 5  |
| 12 | 1277.7343 | 639.3708        | 1260.7078 | 630.8575         |                |                  | A    | 377.1303  | 189.0688        |           |                  | 359.1197       | 180.0635         | 4  |
| 13 | 1334.7558 | 667.8815        | 1317.7293 | 659.3683         |                |                  | G    | 306.0932  | 153.5502        |           |                  | 288.0826       | 144.5450         | 3  |
| 14 | 1449.7827 | 725.3950        | 1432.7562 | 716.8817         | 1431.7722      | 716.3897         | D    | 249.0717  | 125.0395        |           |                  | 231.0612       | 116.0342         | 2  |
| 15 |           |                 |           |                  |                |                  | D    | 134.0448  | 67.5260         |           |                  | 116.0342       | 58.5207          | 1  |



**Suppl. Fig. S2. g) Protein:** TRAF-type zinc finger domain-containing protein, Uniprot O14545  
**Peptide sequence:** TAKAKPSKQQGAGDA  
**Precursor m/z:** 833.9609  
**Precursor z:** +2  
**Highest Mascot score:** 35

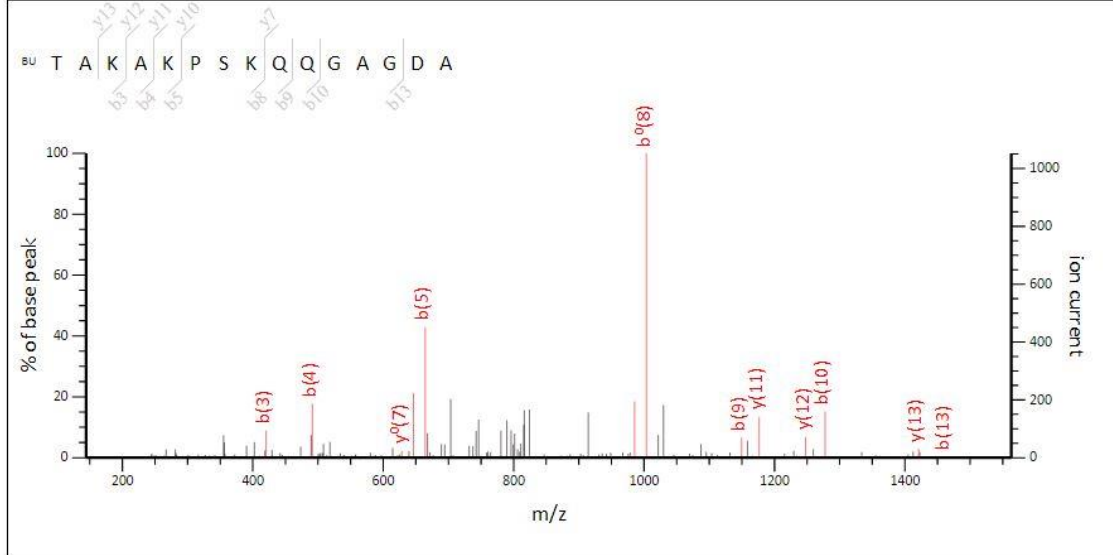

Monoisotopic mass of neutral peptide Mr(calc): 1665.9069  
 Fixed modifications: Acetyl:2H(3) (K), Oxidation (M) (apply to specified residues or termini only)  
 Variable modifications:  
 N-term : Butyl:13C(4) (N-term)  
 Ions Score: 35 Expect: 0.0053  
 Matches : 15/152 fragment ions using 25 most intense peaks

| #  | b                | b <sup>++</sup> | b <sup>*</sup> | b <sup>*++</sup> | b <sup>0</sup>   | b <sup>0++</sup> | Seq. | y                | y <sup>++</sup> | y <sup>*</sup> | y <sup>*++</sup> | y <sup>0</sup>  | y <sup>0++</sup> | #  |
|----|------------------|-----------------|----------------|------------------|------------------|------------------|------|------------------|-----------------|----------------|------------------|-----------------|------------------|----|
| 1  | 176.1102         | 88.5588         |                |                  | 158.0997         | 79.5535          | T    |                  |                 |                |                  |                 |                  | 15 |
| 2  | 247.1474         | 124.0773        |                |                  | 229.1368         | 115.0720         | A    | 1491.8112        | 746.4092        | 1474.7846      | 737.8960         | 1473.8006       | 737.4040         | 14 |
| 3  | <b>420.2717</b>  | 210.6395        | 403.2452       | 202.1262         | 402.2611         | 201.6342         | K    | <b>1420.7741</b> | 710.8907        | 1403.7475      | 702.3774         | 1402.7635       | 701.8854         | 13 |
| 4  | <b>491.3088</b>  | 246.1581        | 474.2823       | 237.6448         | 473.2983         | 237.1528         | A    | <b>1247.6497</b> | 624.3285        | 1230.6232      | 615.8152         | 1229.6392       | 615.3232         | 12 |
| 5  | <b>664.4332</b>  | 332.2202        | 647.4066       | 324.2070         | <b>646.4226</b>  | 323.7149         | K    | <b>1176.6126</b> | 588.8099        | 1159.5861      | 580.2967         | 1158.6020       | 579.8047         | 11 |
| 6  | 761.4859         | 381.2466        | 744.4594       | 372.7333         | 743.4754         | 372.2413         | P    | <b>1003.4882</b> | 502.2478        | 986.4617       | 493.7345         | <b>985.4777</b> | 493.2425         | 10 |
| 7  | 848.5180         | 424.7626        | 831.4914       | 416.2494         | 830.5074         | 415.7573         | S    | 906.4355         | 453.7214        | 889.4089       | 445.2081         | 888.4249        | 444.7161         | 9  |
| 8  | 1021.6423        | 511.3248        | 1004.6158      | 502.8115         | <b>1003.6318</b> | 502.3195         | K    | 819.4035         | 410.2054        | 802.3769       | 401.6921         | 801.3929        | 401.2001         | 8  |
| 9  | <b>1149.7009</b> | 575.3541        | 1132.6744      | 566.8408         | 1131.6903        | 566.3488         | Q    | <b>646.2791</b>  | 323.6432        | 629.2525       | 315.1299         | <b>628.2685</b> | 314.6379         | 7  |
| 10 | <b>1277.7595</b> | 639.3834        | 1260.7329      | 630.8701         | 1259.7489        | 630.3781         | Q    | 518.2205         | 259.6139        | 501.1940       | 251.1006         | 500.2100        | 250.6086         | 6  |
| 11 | 1334.7810        | 667.8941        | 1317.7544      | 659.3808         | 1316.7704        | 658.8888         | G    | 390.1619         | 195.5846        |                |                  | 372.1514        | 186.5793         | 5  |
| 12 | 1405.8181        | 703.4127        | 1388.7915      | 694.8994         | 1387.8075        | 694.4074         | A    | 333.1405         | 167.0739        |                |                  | 315.1299        | 158.0686         | 4  |
| 13 | <b>1462.8395</b> | 731.9234        | 1445.8130      | 723.4101         | 1444.8290        | 722.9181         | G    | 262.1034         | 131.5553        |                |                  | 244.0928        | 122.5500         | 3  |
| 14 | 1577.8665        | 789.4369        | 1560.8399      | 780.9236         | 1559.8559        | 780.4316         | D    | 205.0819         | 103.0446        |                |                  | 187.0713        | 94.0393          | 2  |
| 15 |                  |                 |                |                  |                  |                  | A    | 90.0550          | 45.5311         |                |                  |                 |                  | 1  |

Suppl. Fig. S2. h) Protein: High mobility group protein B3, Uniprot O15347

Peptide sequence: KKVEEDEE

Precursor m/z: 585.2972

Precursor z: +2

Highest Mascot score: 40

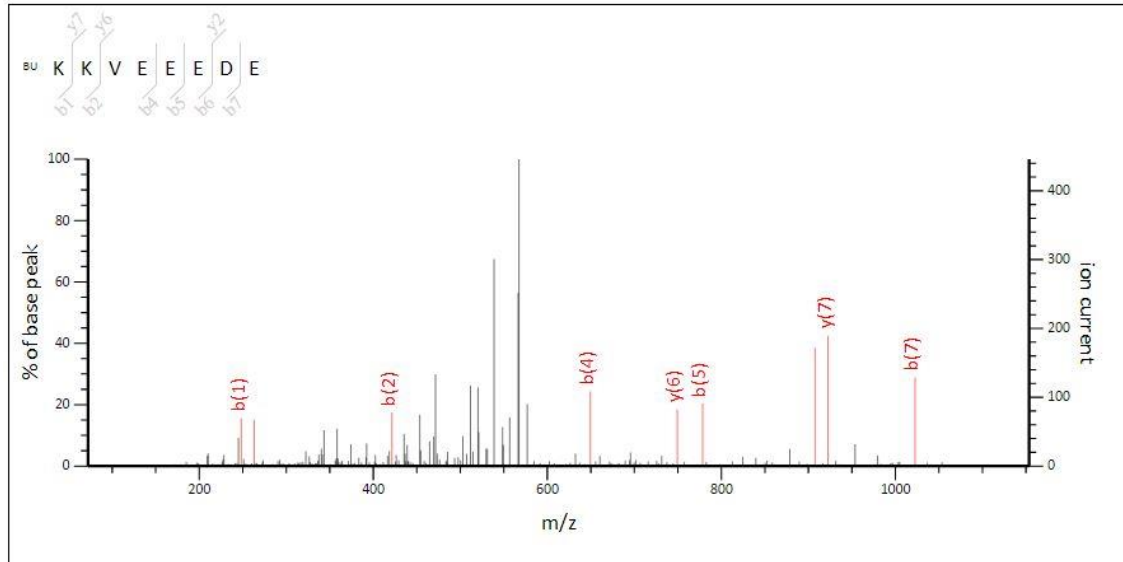

Monoisotopic mass of neutral peptide Mr(calc): 1168.5803

Fixed modifications: Acetyl:2H(3) (K), Oxidation (M) (apply to specified residues or termini only)

Variable modifications:

N-term : Butyl:13C(4) (N-term)

Ions Score: 40 Expect: 0.0018

Matches : 9/66 fragment ions using 18 most intense peaks

| # | b         | b <sup>++</sup> | b*        | b <sup>+++</sup> | b <sup>0</sup> | b <sup>0++</sup> | Seq. | y        | y <sup>++</sup> | y*       | y <sup>+++</sup> | y <sup>0</sup> | y <sup>0++</sup> | # |
|---|-----------|-----------------|-----------|------------------|----------------|------------------|------|----------|-----------------|----------|------------------|----------------|------------------|---|
| 1 | 248.1869  | 124.5971        | 231.1604  | 116.0838         |                |                  | K    |          |                 |          |                  |                |                  | 8 |
| 2 | 421.3113  | 211.1593        | 404.2847  | 202.6460         |                |                  | K    | 922.4079 | 461.7076        | 905.3814 | 453.1943         | 904.3974       | 452.7023         | 7 |
| 3 | 520.3797  | 260.6935        | 503.3531  | 252.1802         |                |                  | V    | 749.2836 | 375.1454        |          |                  | 731.2730       | 366.1401         | 6 |
| 4 | 649.4223  | 325.2148        | 632.3957  | 316.7015         | 631.4117       | 316.2095         | E    | 650.2152 | 325.6112        |          |                  | 632.2046       | 316.6059         | 5 |
| 5 | 778.4649  | 389.7361        | 761.4383  | 381.2228         | 760.4543       | 380.7308         | E    | 521.1726 | 261.0899        |          |                  | 503.1620       | 252.0846         | 4 |
| 6 | 907.5075  | 454.2574        | 890.4809  | 445.7441         | 889.4969       | 445.2521         | E    | 392.1300 | 196.5686        |          |                  | 374.1194       | 187.5633         | 3 |
| 7 | 1022.5344 | 511.7708        | 1005.5079 | 503.2576         | 1004.5238      | 502.7656         | D    | 263.0874 | 132.0473        |          |                  | 245.0768       | 123.0420         | 2 |
| 8 |           |                 |           |                  |                |                  | E    | 148.0604 | 74.5339         |          |                  | 130.0499       | 65.5286          | 1 |

**Suppl. Fig. S2. i) Protein:** High mobility group protein B3, Uniprot O15347  
**Peptide sequence:** KKVEEED  
**Precursor m/z:** 520.7759  
**Precursor z:** +2  
**Highest Mascot score:** 36

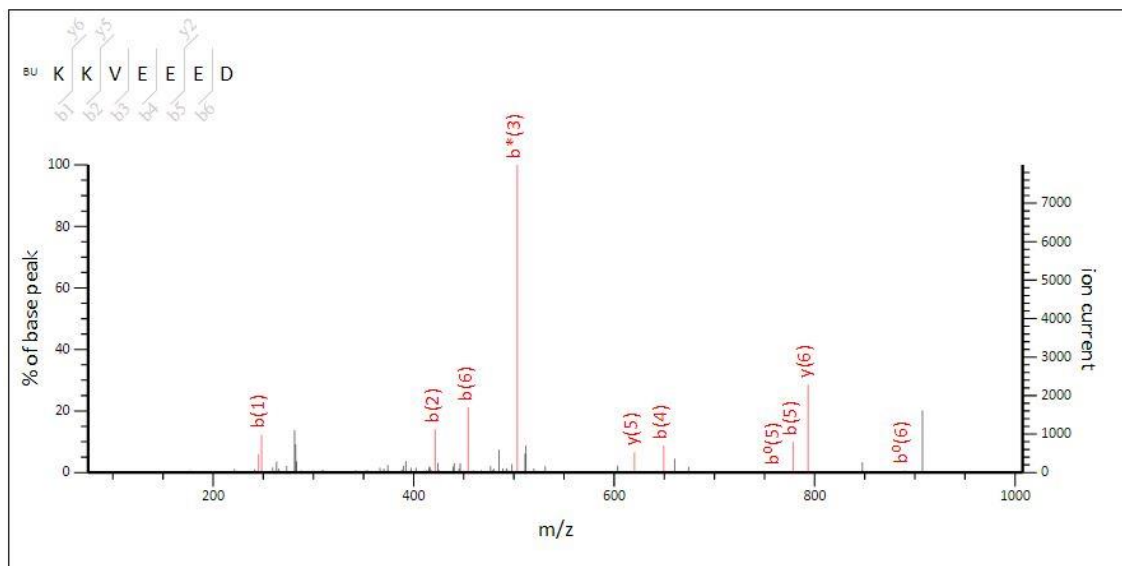

Monoisotopic mass of neutral peptide  $M_r(\text{calc})$ : 1039.5377  
 Fixed modifications: Acetyl:2H(3) (K), Oxidation (M) (apply to specified residues or termini only)  
 Variable modifications:  
 N-term : Butyl:13C(4) (N-term)  
 Ions Score: 36 Expect: 0.054  
 Matches : 13/56 fragment ions using 16 most intense peaks

| # | b        | b <sup>++</sup> | b*       | b <sup>*++</sup> | b <sup>0</sup> | b <sup>0++</sup> | Seq. | y        | y <sup>++</sup> | y*       | y <sup>*++</sup> | y <sup>0</sup> | y <sup>0++</sup> | # |
|---|----------|-----------------|----------|------------------|----------------|------------------|------|----------|-----------------|----------|------------------|----------------|------------------|---|
| 1 | 248.1869 | 124.5971        | 231.1604 | 116.0838         |                |                  | K    |          |                 |          |                  |                |                  | 7 |
| 2 | 421.3113 | 211.1593        | 404.2847 | 202.6460         |                |                  | K    | 793.3653 | 397.1863        | 776.3388 | 388.6730         | 775.3548       | 388.1810         | 6 |
| 3 | 520.3797 | 260.6935        | 503.3531 | 252.1802         |                |                  | V    | 620.2410 | 310.6241        |          |                  | 602.2304       | 301.6188         | 5 |
| 4 | 649.4223 | 325.2148        | 632.3957 | 316.7015         | 631.4117       | 316.2095         | E    | 521.1726 | 261.0899        |          |                  | 503.1620       | 252.0846         | 4 |
| 5 | 778.4649 | 389.7361        | 761.4383 | 381.2228         | 760.4543       | 380.7308         | E    | 392.1300 | 196.5686        |          |                  | 374.1194       | 187.5633         | 3 |
| 6 | 907.5075 | 454.2574        | 890.4809 | 445.7441         | 889.4969       | 445.2521         | E    | 263.0874 | 132.0473        |          |                  | 245.0768       | 123.0420         | 2 |
| 7 |          |                 |          |                  |                |                  | D    | 134.0448 | 67.5260         |          |                  | 116.0342       | 58.5207          | 1 |

### Supplementary Figure S3

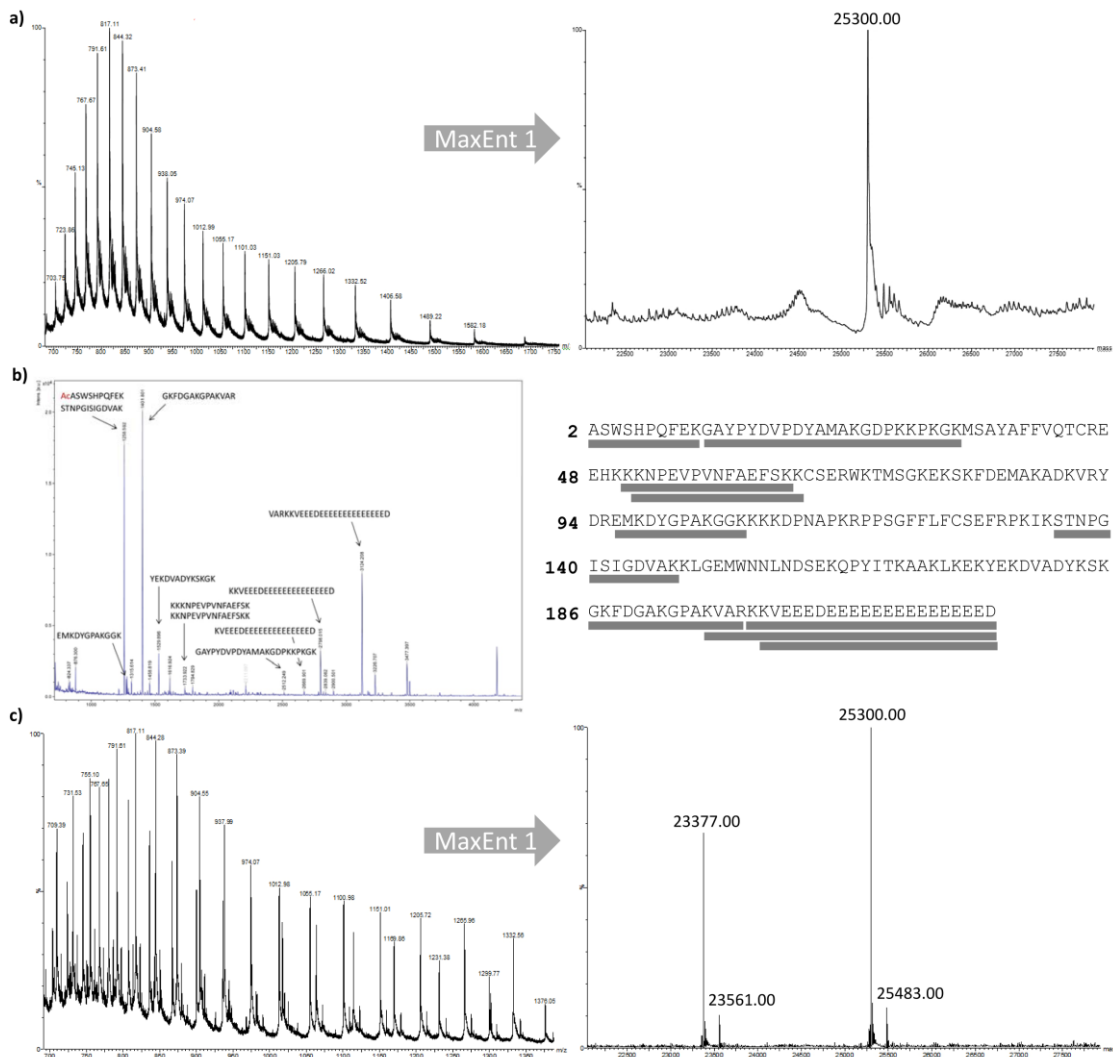

**Supplementary Figure S3. Mass-spectrometric analysis of purified recombinant HMGB3 and its cleavage products. a)** Q-TOF spectrum (left) of purified recombinant HMGB3 and data deconvolution spectrum revealing a molecular mass of 25,300 Da. **b)** Protein characterization by peptide mass fingerprinting allowed for 50% sequence coverage of recombinant purified HMGB3. The distributions of matching peptides in the complete protein sequence are marked with underlying grey boxes. No matching masses were found when considering the unprocessed N- and C-termini of HMGB3. The calculated and observed  $m/z$  values for matching peptides are listed in Supplementary Table S3. The complete peak list is shown in Supplementary Table S4. **c)** Q-TOF spectrum (left) of the purified recombinant HMGB3 after CCP1 treatment. Data deconvolution spectrum reveals the presence of a cleavage product with a molecular mass of 23,377 Da.

### Supplementary Figure S4

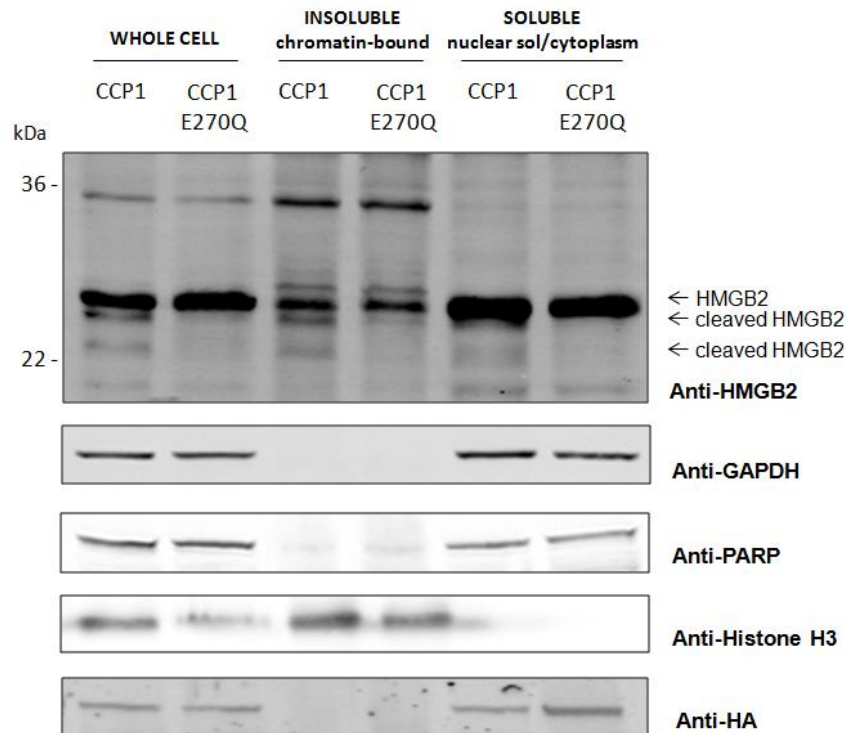

**Supplementary Figure S4. Processing of endogenous HMGB2 upon CCP1 overexpression.** HEK293T cells were transfected with active or inactive CCP1 (CCP1 E270Q). Western blotting using an anti-HMGB2 antibody shows the appearance of processed forms of native HMGB2 when active CCP1 is over-expressed (lanes 1, 3 and 5). Whole cell protein lysates were fractionated into soluble fractions (containing cytosolic and nuclear soluble proteins) and chromatin-bound insoluble fractions (lanes 3-6). Anti-GAPDH (cytosolic marker), anti-PARP (nuclear soluble fraction marker) and anti-histone H3 (chromatin-bound/insoluble nuclear marker) were used to demonstrate the purity of the fractions. The anti-HA-tag antibody shows equal expression levels of both CCP1 variants.

## Supplementary Data: Supplementary Tables

**Supplementary Table S1:** List of the identified butyrylated peptides, corresponding to database annotated and processed C-termini. In all cases the corresponding Swiss-Prot accession number, protein description, sequence identified, modifications observed, start position of the peptide,  $m/z$  and  $z$  of the highest scoring spectra are indicated. The light over heavy ratios (control sample over CCP1 overexpressing sample) of the ion intensities observed in MS for the highest scoring peptide, is also shown (L/H ratio HS). In case of the absence of light peptide ions, the peptide was indicated as heavy singleton. Similarly, light singleton was used in the absence of the heavy ions. In addition, the ratios significantly altered using a stringent p-value threshold of 0.0001 are indicated. Peptides are classified (column peptide type) as database annotated C-termini and processed C-termini, and for the latter the residues missing from the C-terminus are indicated (C-terminal residues in protein sequence). Additional information related to the observed mass error (Da), possible protein isoforms holding the same peptide, number of identified spectra (# spectra), the maximum Mascot ion score, minimum threshold score and delta threshold (= maximum score – minimum threshold) are additionally indicated. \*\*\*\* = p-value <0.0001. Abbreviations: But,  $^{12}\text{C}_4$ -butyrylation of peptide N-termini; But4C13,  $^{13}\text{C}_4$ -butyrylation of peptide N-termini; AcD3K, D3-acetylation at lysines; Mox, oxidized methionine.

**Supplementary Table S2. Intact C-termini of the identified putative CCP1 substrates**

| <b>Protein</b>                                     | <b>Identified C-terminal peptide</b> | <b>L/H ratio</b> | <b>Z-score</b> |
|----------------------------------------------------|--------------------------------------|------------------|----------------|
| <b><math>\alpha</math>-tubulin 1A/1B</b>           | EDMAALEKDYEEVGVDSEGESEEGEEY          | 0.86             | -0.55          |
| <b><math>\alpha</math>-tubulin 1C</b>              | EDMAALEKDYEEVGADSDGEDEGEY            | 0.20             | -4.79          |
| <b>Eukaryotic translation initiation factor 4H</b> | EEVVQKEQE                            | 0.95             | -0.28          |
| <b>Stathmin</b>                                    | KNKESKDPADTEAD                       | 0.56             | -1.81          |
| <b>40S ribosomal protein S9</b>                    | KNAKKGQGGAGAGDDEED                   | 0.83             | -0.69          |

**Supplementary Table S3. Calculated and observed masses for tryptic peptides of purified recombinant HMGB3.**

| Peak | Intensity | Amino acid sequence |     | [M+H] <sup>+</sup> |          | Missed Cleavages | Sequence                 | Modified sequence                      |
|------|-----------|---------------------|-----|--------------------|----------|------------------|--------------------------|----------------------------------------|
|      |           | From <sup>a</sup>   | To  | Calculated         | Observed |                  |                          |                                        |
| 4    | 16399.156 | 1                   | 10  | 1258.585           | 1258.592 | 0                | ASWSHPQFEK               | <b>Ac</b> -ASWSHPQFEK                  |
| 4    | 16399.156 | 134                 | 146 | 1258.663           | 1258.592 | 0                | STNPGISIGDVAK            | STNPGISIGDVAK                          |
| 6    | 1315.728  | 95                  | 106 | 1280.630           | 1280.573 | 2                | EMKDYGPAKGGK             | EMKDYGPAKGGK                           |
| 8    | 18940.384 | 185                 | 198 | 1401.796           | 1401.801 | 3                | GKFDGAKGPAKVAR           | GKFDGAKGPAKVAR                         |
| 10   | 3103.273  | 174                 | 186 | 1530.780           | 1529.896 | 3                | YEKDVADYKSKGK            | YEKDVADYKSKGK                          |
| 12   | 1733.922  | 50                  | 64  | 1733.922           | 1733.922 | 2                | KKNPEVPVNFAEFSK          | KKNPEVPVNFAEFSK                        |
| 12   | 1733.922  | 51                  | 65  | 1733.922           | 1733.922 | 2                | KNPEVPVNFAEFSKK          | KNPEVPVNFAEFSKK                        |
| 15   | 186.000   | 11                  | 33  | 2512.254           | 2512.249 | 3                | GAYPYDVPDYAMAKGDPKKPKGK  | GAYPYDVPDYAM< <b>Mox</b> *>AKGDPKKPKGK |
| 16   | 259.000   | 200                 | 220 | 2669.959           | 2669.901 | 1                | KVEEEDEEEEEEEEEEEEED     | KVEEEDEEEEEEEEEEEEED                   |
| 18   | 2032.654  | 199                 | 220 | 2798.054           | 2798.015 | 2                | KKVEEEDEEEEEEEEEEEEED    | KKVEEEDEEEEEEEEEEEEED                  |
| 21   | 4425.123  | 196                 | 220 | 3124.261           | 3124.208 | 3                | VARKKVEEEDEEEEEEEEEEEEED | VARKKVEEEDEEEEEEEEEEEEED               |

Abbreviations: Ac, acetyl; Mox, oxidized methionine.

<sup>a</sup> Residues are numbered considering an HMGB3 form lacking the N-terminal initiator methionine.



**Supplementary Table S4 - Peak list generated by MALDI-TOF analysis of a tryptic digest of purified recombinant HMGB3.**

| Peak | m/z      | Time     | Intensity | Signal/Noise ratio | Quality Factor | Resolution | Area     |
|------|----------|----------|-----------|--------------------|----------------|------------|----------|
| 1    | 824.337  | 45500.89 | 875.668   | 6.970              | 392.441        | 8805.339   | 134.872  |
| 2    | 832.342  | 45719.15 | 941.832   | 7.585              | 297.453        | 8424.265   | 151.887  |
| 3    | 876.300  | 46899.39 | 1750.101  | 15.081             | 525.985        | 7435.218   | 355.768  |
| 4    | 1258.592 | 56114.12 | 16399.156 | 217.190            | 18328.231      | 14154.026  | 3305.032 |
| 5    | 1274.587 | 56466.48 | 1179.179  | 15.335             | 1966.674       | 14269.501  | 229.097  |
| 6    | 1280.573 | 56597.80 | 1315.728  | 17.222             | 3133.839       | 13562.994  | 275.144  |
| 7    | 1315.614 | 57360.31 | 990.743   | 13.095             | 1694.030       | 14525.900  | 199.083  |
| 8    | 1401.801 | 59193.53 | 18940.384 | 276.900            | 23777.888      | 14670.167  | 4469.781 |
| 9    | 1458.819 | 60375.39 | 885.523   | 12.373             | 3085.337       | 15548.733  | 198.282  |
| 10   | 1529.896 | 61816.65 | 3103.273  | 46.345             | 15679.582      | 16631.633  | 754.291  |
| 11   | 1616.924 | 63536.37 | 1048.364  | 15.380             | 4074.548       | 14744.940  | 305.465  |
| 12   | 1733.922 | 65776.72 | 477.462   | 6.698              | 1549.114       | 17323.771  | 129.940  |
| 13   | 1794.829 | 66912.99 | 521.084   | 7.434              | 1178.839       | 12730.754  | 205.746  |
| 14   | 2211.097 | 74210.00 | 564.000   | 8.095              |                | 16216.774  | 82.952   |
| 15   | 2512.249 | 79066.41 | 186.000   | 2.267              |                | 10779.765  | 39.754   |
| 16   | 2669.901 | 81492.30 | 259.000   | 3.758              |                | 15420.364  | 46.824   |
| 17   | 2783.212 | 83191.80 | 236.000   | 3.431              |                | 12862.457  | 56.125   |
| 18   | 2798.015 | 83411.24 | 2032.654  | 55.798             | 12446.153      | 17981.107  | 1179.762 |
| 19   | 2839.082 | 84016.99 | 184.000   | 2.564              |                | 15689.759  | 24.586   |
| 20   | 2900.501 | 84914.80 | 226.000   | 3.509              |                | 12411.483  | 45.378   |
| 21   | 3124.208 | 88106.87 | 4425.123  | 152.159            | 10333.571      | 18328.942  | 3105.778 |
| 22   | 3226.707 | 89531.07 | 794.478   | 28.088             | 3920.512       | 15759.491  | 647.241  |
| 23   | 3477.397 | 92921.58 | 1031.823  | 44.047             | 3284.136       | 16922.644  | 903.032  |
| 24   | 3496.864 | 93179.64 | 501.346   | 21.123             | 3444.219       | 15235.753  | 473.585  |

**Supplementary Table S5 – List of human proteins containing a stretch of at least 3 consecutive acidic residues in their gene-encoded C-terminus**

| Number | Name                                                           | UniProt | C-terminus                                                                   |
|--------|----------------------------------------------------------------|---------|------------------------------------------------------------------------------|
| 1      | High mobility group protein B1                                 | P09429  | SKKKK <sup>a</sup> EEEEDEEDEE <sup>a</sup> EEEEDEEDEE <sup>a</sup> DEEEDDDDE |
| 2      | Putative high mobility group protein B1-like 1                 | B2RPK0  | SKKKK <sup>a</sup> EEEEDEEDEE <sup>a</sup> EEEEDEEDEE <sup>a</sup> DEEEDDDDE |
| 3      | High mobility group protein B2                                 | P26583  | KKNEP <sup>a</sup> EEEEEEEEDEE <sup>a</sup> DEEEEEDEE <sup>a</sup>           |
| 4      | High mobility group protein B3 <sup>a</sup>                    | O15347  | ARKKV <sup>a</sup> EEEEEEEEEEEEEEEE <sup>a</sup>                             |
| 5      | Homeobox protein Hox-A7                                        | P31268  | AADKA <sup>a</sup> DEEDD <sup>a</sup> EEEEDEE <sup>a</sup>                   |
| 6      | Cytosolic purine 5'-nucleotidase                               | P49902  | ITHCH <sup>a</sup> DEDD <sup>a</sup> EEEEEEEE <sup>a</sup>                   |
| 7      | Translocation protein SEC63 homolog                            | Q9UGP8  | FEDSF <sup>a</sup> EEEEEEEE <sup>a</sup> DDDD <sup>a</sup>                   |
| 8      | mTERF domain-containing protein 2                              | Q7Z6M4  | EAEDN <sup>a</sup> DEDE <sup>a</sup> DDDEE <sup>a</sup>                      |
| 9      | 60S ribosomal protein L22                                      | P35268  | FQINQ <sup>a</sup> DEEEEE <sup>a</sup> DED <sup>a</sup>                      |
| 10     | Calsequestrin-1                                                | P31415  | GEINTE <sup>a</sup> DDDD <sup>a</sup> DDDD <sup>a</sup>                      |
| 11     | Ubiquitin thioesterase ZRANB1                                  | Q9UGI0  | SLSDG <sup>a</sup> EED <sup>a</sup> DEDE <sup>a</sup>                        |
| 12     | Calcium-dependent secretion activator 1                        | Q9ULU8  | SMKDS <sup>a</sup> DEE <sup>a</sup> DEED <sup>a</sup>                        |
| 13     | Putative high mobility group protein B3-like                   | P0C6E5  | AQKKV <sup>a</sup> EEEE <sup>a</sup> DEE <sup>a</sup>                        |
| 14     | RNA polymerase-associated protein LEO1                         | Q8WVC0  | KYVIS <sup>a</sup> DEEE <sup>a</sup> DDDD <sup>a</sup>                       |
| 15     | LIM domain and actin-binding protein 1                         | Q9UHB6  | RNRY <sup>a</sup> DE <sup>a</sup> DEE <sup>a</sup>                           |
| 16     | Essential MCU regulator, mitochondrial                         | Q9H4I9  | DIFVP <sup>a</sup> EDDD <sup>a</sup> DDDD <sup>a</sup>                       |
| 17     | Calsequestrin-2                                                | O14958  | DNDD <sup>a</sup> SDDD <sup>a</sup> DE <sup>a</sup>                          |
| 18     | Cell cycle control protein 50B                                 | Q3MIR4  | RYQDQ <sup>a</sup> DDDD <sup>a</sup> DEE <sup>a</sup>                        |
| 19     | Dipeptidyl aminopeptidase-like protein 6                       | P42658  | TVTAK <sup>a</sup> EDEE <sup>a</sup> ED <sup>a</sup>                         |
| 20     | Homeobox protein Hox-B7                                        | P09629  | DRAEA <sup>a</sup> EEEE <sup>a</sup> EE <sup>a</sup>                         |
| 21     | Metaxin-1                                                      | Q13505  | LGMA <sup>a</sup> EDEE <sup>a</sup> EE <sup>a</sup>                          |
| 22     | 40S ribosomal protein S9 <sup>a</sup>                          | P46781  | GAGAG <sup>a</sup> DDEE <sup>a</sup> ED <sup>a</sup>                         |
| 23     | Protein timeless homolog                                       | Q9UNS1  | KRYQI <sup>a</sup> EDDE <sup>a</sup> DD <sup>a</sup>                         |
| 24     | TRAF-type zinc finger domain-containing protein 1 <sup>a</sup> | O14545  | GAGDA <sup>a</sup> EEEE <sup>a</sup> EE <sup>a</sup>                         |
| 25     | Acidic leucine-rich nuclear phosphoprotein 32 family member E  | Q9BTT0  | AEDDG <sup>a</sup> EEE <sup>a</sup> DD <sup>a</sup>                          |
| 26     | Interferon alpha-inducible protein 6                           | P09912  | KYLD <sup>a</sup> SE <sup>a</sup> DEE <sup>a</sup>                           |
| 27     | Myosin light chain kinase, smooth muscle <sup>a</sup>          | Q15746  | GEGEG <sup>a</sup> EEEE <sup>a</sup> EE <sup>a</sup>                         |
| 28     | Choline-phosphate cytidyltransferase A                         | P49585  | AYDIS <sup>a</sup> EDEE <sup>a</sup> ED <sup>a</sup>                         |
| 39     | Protein SSX1                                                   | Q16384  | EISDP <sup>a</sup> EED <sup>a</sup> DE <sup>a</sup>                          |
| 30     | Protein SSX2                                                   | Q16385  | EISDP <sup>a</sup> EED <sup>a</sup> DE <sup>a</sup>                          |
| 31     | Protein SSX3                                                   | Q99909  | EISDP <sup>a</sup> EED <sup>a</sup> DE <sup>a</sup>                          |
| 32     | Protein SSX4                                                   | O60224  | EISDP <sup>a</sup> EED <sup>a</sup> DE <sup>a</sup>                          |
| 33     | Protein SSX7                                                   | Q7RTT5  | EISDP <sup>a</sup> EED <sup>a</sup> DE <sup>a</sup>                          |
| 34     | Protein SSX8                                                   | Q7RTT4  | EIRD <sup>a</sup> P <sup>a</sup> EED <sup>a</sup> DE <sup>a</sup>            |
| 35     | Protein SSX9                                                   | Q7RTT3  | EISDP <sup>a</sup> EED <sup>a</sup> DE <sup>a</sup>                          |
| 36     | Transmembrane protein 190                                      | Q8WZ59  | EETEG <sup>a</sup> EEEE <sup>a</sup> DD <sup>a</sup>                         |
| 37     | Acidic leucine-rich nuclear phosphoprotein 32 family member A  | P39687  | PEDEG <sup>a</sup> EDDD <sup>a</sup>                                         |
| 38     | Complement C1r subcomponent                                    | P00736  | IKKEM <sup>a</sup> EEED <sup>a</sup>                                         |
| 39     | Mitotic interactor and substrate of PLK1                       | Q8IVT2  | RIYASE <sup>a</sup> EDD <sup>a</sup>                                         |
| 40     | Doublesex- and mab-3-related transcription factor 1            | Q9Y5R6  | VTPVIE <sup>a</sup> EDE <sup>a</sup>                                         |

|    |                                                                            |        |                        |
|----|----------------------------------------------------------------------------|--------|------------------------|
| 41 | Inactive dipeptidyl peptidase 10                                           | Q8N608 | LPQEP <del>E</del> DE  |
| 42 | Inositol monophosphatase 1                                                 | P29218 | IPLQR <del>D</del> DED |
| 43 | mRNA turnover protein 4 homolog                                            | Q9UKD2 | EESDS <del>E</del> DDD |
| 44 | NADH dehydrogenase [ubiquinone] 1 beta subcomplex subunit 2, mitochondrial | O95178 | LGIPP <del>D</del> DED |
| 45 | Ornithine decarboxylase antizyme 1                                         | P54368 | RESSG <del>E</del> EEE |
| 46 | cGMP-inhibited 3',5'-cyclic phosphodiesterase B                            | Q13370 | VIEEA <del>D</del> EEE |
| 47 | Protein SSX5                                                               | O60225 | ISDPQ <del>E</del> DE  |
| 48 | Transcription factor Dp-1                                                  | Q14186 | DFNEN <del>D</del> EDD |
| 49 | Transcription factor Dp family member 3                                    | Q5H910 | DLSEN <del>D</del> EDD |
| 50 | Guanine nucleotide exchange factor VAV3                                    | Q9UKW4 | PSTYV <del>E</del> EDE |
| 51 | DDB1- and CUL4-associated factor 6                                         | Q58WW2 | QENENE <del>D</del> EE |
| 52 | Prothymosin alpha                                                          | P06454 | KKQKT <del>D</del> EDD |
| 53 | Acidic leucine-rich nuclear phosphoprotein 32 family member B              | Q92688 | TDDEG <del>E</del> DD  |
| 54 | Ankyrin repeat domain-containing protein 35                                | Q8N283 | QILSM <del>E</del> EEE |
| 55 | Annexin A5                                                                 | P08758 | LLLCG <del>E</del> DD  |
| 56 | Complement C1q tumor necrosis factor-related protein 6                     | Q9BXI9 | HLIKA <del>E</del> DD  |
| 57 | Cadherin-1                                                                 | P12830 | MYGGG <del>E</del> DD  |
| 58 | Cadherin-3                                                                 | P22223 | MYGGG <del>E</del> DD  |
| 59 | Cadherin-4                                                                 | P55283 | MYGGG <del>E</del> DD  |
| 60 | Cell division cycle protein 123 homolog                                    | O75794 | KRNQQ <del>E</del> DD  |
| 61 | Phosphatidate cytidyltransferase 2                                         | O95674 | LTSTT <del>E</del> DE  |
| 62 | Uncharacterized protein C11orf57                                           | Q6ZUT1 | SAESSE <del>D</del> DD |
| 63 | Cytochrome c oxidase subunit 6A1, mitochondrial                            | P12074 | LPTGY <del>E</del> DE  |
| 64 | EGF-like repeat and discoidin I-like domain-containing protein 3           | O43854 | LLGCT <del>E</del> EEE |
| 65 | EF-hand domain-containing family member C2                                 | Q5JST6 | DAFGL <del>E</del> EEE |
| 66 | Translation initiation factor eIF-2B subunit epsilon                       | Q13144 | EEESSE <del>D</del> DD |
| 67 | Protein FAM47A                                                             | Q5JRC9 | IVEASE <del>E</del> ED |
| 68 | Putative protein FAM47C                                                    | Q5HY64 | VTDASE <del>E</del> ED |
| 69 | Guanylate cyclase soluble subunit beta-1                                   | Q02153 | EETKQ <del>D</del> DDD |
| 70 | G patch domain and KOW motifs-containing protein                           | Q92917 | GPSDT <del>D</del> DDD |
| 71 | Homeobox-containing protein 1                                              | Q6NT76 | KTEAL <del>D</del> DDD |
| 72 | High mobility group protein HMGI-C                                         | P52926 | SQESA <del>E</del> EED |
| 73 | Putative eukaryotic translation initiation factor 2 subunit 3-like protein | Q2VIR3 | IKPTV <del>D</del> DDD |
| 74 | Eukaryotic translation initiation factor 2 subunit 3                       | P41091 | IKPTV <del>D</del> DDD |
| 75 | Interferon-induced helicase C domain-containing protein 1                  | Q9BYX4 | CCLFS <del>D</del> ED  |
| 76 | Interleukin-1 receptor antagonist protein                                  | P18510 | KFYFQ <del>E</del> DE  |
| 77 | Mitochondrial inner membrane protease subunit 2                            | Q96T52 | LPVQR <del>E</del> EEE |
| 78 | Leucine-rich repeat-containing protein 8E                                  | Q6NSJ5 | VRDKM <del>E</del> EEE |
| 79 | Mitogen-activated protein kinase kinase kinase 4                           | Q9Y6R4 | VKVCT <del>D</del> EE  |
| 80 | Mitotic interactor and substrate of PLK1                                   | Q8IVT2 | IYASE <del>D</del> DD  |
| 81 | Monocarboxylate transporter 13                                             | Q7RTY0 | PKEGLE <del>D</del> ED |

|     |                                                                                    |        |                  |
|-----|------------------------------------------------------------------------------------|--------|------------------|
| 82  | <b>Myosin-6</b>                                                                    | P13533 | KQKMH <b>DEE</b> |
| 83  | <b>NADH dehydrogenase [ubiquinone] 1 beta subcomplex subunit 11, mitochondrial</b> | Q9NX14 | KIQL <b>PEDE</b> |
| 84  | <b>Nucleolar complex protein 2 homolog</b>                                         | Q9Y3T9 | DLQL <b>SEDD</b> |
| 85  | <b>Nuclear speckle splicing regulatory protein 1</b>                               | Q9H0G5 | TYIE <b>KEDD</b> |
| 86  | <b>Ornithine decarboxylase antizyme 2</b>                                          | O95190 | DQNL <b>SDED</b> |
| 87  | <b>Inositol polyphosphate 5-phosphatase OCRL-1</b>                                 | Q01968 | FLLG <b>SEED</b> |
| 88  | <b>Serine/threonine-protein phosphatase 2A regulatory subunit B" subunit alpha</b> | Q06190 | KLQSV <b>DEE</b> |
| 89  | <b>Protein pelota homolog</b>                                                      | Q9BRX2 | GDSS <b>SEED</b> |
| 90  | <b>Histone-lysine N-methyltransferase PRDM9</b>                                    | Q9NQV7 | PYVCR <b>EDE</b> |
| 91  | <b>PTPN13-like protein, Y-linked</b>                                               | O14603 | CGHV <b>HEED</b> |
| 92  | <b>Transcriptional activator protein Pur-alpha.</b>                                | Q00577 | GEEEG <b>EED</b> |
| 93  | <b>Transcriptional activator protein Pur-beta</b>                                  | Q96QR8 | EGEEV <b>DED</b> |
| 94  | <b>UV excision repair protein RAD23 homolog A</b>                                  | P54725 | LSQNF <b>DDE</b> |
| 95  | <b>UV excision repair protein RAD23 homolog B</b>                                  | P54727 | LQQNF <b>DED</b> |
| 96  | <b>Rho GTPase-activating protein 15</b>                                            | Q53QZ3 | KIFG <b>SEED</b> |
| 97  | <b>RWD domain-containing protein 4</b>                                             | Q6NW29 | KTGSK <b>DDE</b> |
| 98  | <b>Protein SET</b>                                                                 | Q01105 | EEDE <b>GEDD</b> |
| 99  | <b>Probable global transcription activator SNF2L2</b>                              | P51531 | EGSGT <b>DDE</b> |
| 100 | <b>Transcription activator BRG1</b>                                                | P51532 | SGSG <b>SEED</b> |
| 101 | <b>Small integral membrane protein 4</b>                                           | Q8WV10 | YQRR <b>LEDE</b> |
| 102 | <b>Small integral membrane protein 6</b>                                           | P0DI80 | QCEAG <b>EEE</b> |
| 103 | <b>Sorting nexin-16</b>                                                            | P57768 | VAYDA <b>EED</b> |
| 104 | <b>TLD domain-containing protein 1</b>                                             | Q6P9B6 | LREVP <b>DDE</b> |
| 105 | <b>Transmembrane protein 109</b>                                                   | Q9BVC6 | GARSV <b>EEE</b> |
| 106 | <b>Transmembrane protein 45B</b>                                                   | Q96B21 | LLSG <b>SDEE</b> |
| 107 | <b>Transmembrane protein 44</b>                                                    | Q2T9K0 | TAHLS <b>DDD</b> |
| 108 | <b>Triple QxxK/R motif-containing protein</b>                                      | Q629K1 | PDL <b>DQDED</b> |
| 109 | <b>Teashirt homolog 2</b>                                                          | Q9NRE2 | FVTDV <b>DEE</b> |
| 110 | <b>Thioredoxin domain-containing protein 9</b>                                     | O14530 | YSDS <b>DDD</b>  |
| 111 | <b>WD repeat-containing protein 43</b>                                             | Q15061 | PENES <b>EEE</b> |

<sup>a</sup> These proteins have been identified as CCP1 substrates in this or previous studies.
